# Supplementary material
Source: PubMed Central journal article supplement (PMC4080569)
Supplement: SD2.pdf [file SD2.pdf]

SUPPLEMENTAL TABLE 1  
Polymerase chain reaction (PCR) primers for RFLP analyses\*

| Target gene                              | Primer sequence                                                                                    |
|------------------------------------------|----------------------------------------------------------------------------------------------------|
| <i>Pfcr1</i> 76 1st round                | 76-A: 5'-GCG CGCGCATGGCTCACGTTTAGGTGGAG-3'<br>76-B: 5'-GGGCCCGGCGGATGTTACAAAACCTATAGTTACC-3'       |
| <i>Pfcr1</i> 76 2nd round                | CQR-A: 5'-TGTGCTCATGTGTTTAAACTT-3'<br>CQR-B: 5'-CAAAAACCTATAGTTACCAATTTTG-3'                       |
| <i>Pfmdr1</i> 86 and 184 1st round       | MDR-A1: 5'-TGTTGAAAGATGGGTAAAGAGCAGAAAGAG-3'<br>MDR-A3: 5'-TACTTTCTTATTACATATGACACCACAAAACA-3'     |
| <i>Pfmdr1</i> 86 and 184 2nd round       | MDR-A4: 5'-AAAGATGGTAACCTCAGTATCAAAGAAGAG-3'<br>MDR-A2: 5'-GTCAAACGT GCA TTTTTTATTAATGACCAT TTA-3' |
| <i>Pfmdr1</i> 1246 1st round             | MDRfr2f1: 5'-GTGTATTTGCTGTAAGAGCT-3'<br>MDRfr2r1: 5'-GACATATTAATAAACATGGGTTC-3'                    |
| <i>Pfmdr1</i> 1246 2nd round             | RFLPn2f: 5'-GAATTTTCAAACCAATCTGGA-3'<br>MDRfr2r2: 5'-TAAATAACATGGGTCTTGGACT-3'                     |
| <i>Pfdhfr</i> 51, 59, 108, 164 1st round | A1: 5'-TTTATATTTTCTCCTTTTAA-3'<br>A2: 5'-CATTTTATTATTCGTTTTTCT-3'                                  |
| <i>Pfdhfr</i> 51,108, 164 2nd round      | A3 5'-GTCTGCGACGTTTTTCGATATTTATGC-3'<br>F1 5'-AAATTCTTGATAAACAACGGAACCTtTA-3'                      |
| <i>Pfdhfr</i> 59 2nd round               | F:5'-GAAATGTAATCCCTAGATATGgAATATT-3'<br>M4: 5'-TTAATTTCCCAAGTAAAACCTATTAGAgCTTC-3'                 |
| <i>Pfdhps</i> 437/540/581 1st round      | R1: 5'-AACCTAAACGTGCTGTTCAA-3'<br>R2: 5'-AATTGTGTGATTTGTCCACAA-3'                                  |
| <i>Pfdhps</i> 437/540 2nd round          | K: 5'-TGCTAGTGTATAGATATAGGatGAGcATC-3'<br>K1: 5'-CTATAACGAGGTATTgCATTTAATgCAAGAA-3'                |
| <i>Pfdhps</i> 581 2nd round              | L1:5'-ATAGGATACTATTTGATATTGGACCAGGATTTCG-3'<br>L2: 5'-ATTACAACATTTTGATCATTTCGCGCAACCGG-3'          |

\*RFLP = restriction fragment length polymorphism.
